# Supplementary material for: NRP-1 and KDR polymorphisms are associated with survival time in patients with advanced gastric cancer
Source: PubMed Central journal article supplement — Oncol Lett. 2019 Sep 10;18(5):4629–38. doi: 10.3892/ol.2019.10842 (PMC6781724; doi:10.3892/ol.2019.10842), 2019-09-10
Supplement: Supplementary_Data.pdf [file Supplementary_Data.pdf]

Figure S1. Effect of kinase insert domain receptor rs1870377 on PFS in patients with different genotypes. (A) AA vs. TT. (B) AT vs. TT. P-values were obtained by log-rank tests. PFS, progression-free survival.

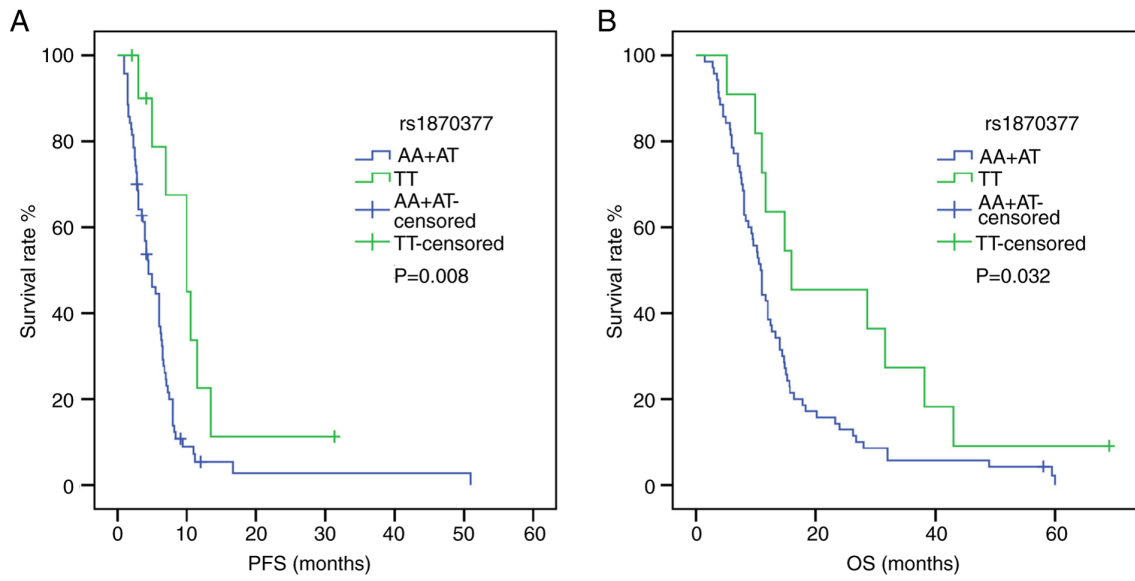

Table SI. MAF of selected SNPs.

| Gene                            | SNP        | MAF in 1000 genomes project |
|---------------------------------|------------|-----------------------------|
| <i>KDR</i>                      | rs7692791  | C=0.3738                    |
|                                 | rs2305948  | T=0.1408                    |
|                                 | rs6838752  | C=0.4854                    |
|                                 | rs2034965  | A=0.2087                    |
|                                 | rs13109660 | A=0.3058                    |
|                                 | rs1870377  | A=0.4951                    |
|                                 | rs1531290  | G=0.2330                    |
| <i>NRP1</i>                     | rs2070296  | A=0.4660                    |
|                                 | rs2804495  | G=0.3835                    |
|                                 | rs2065364  | A=0.2961                    |
| <i>PDGF<math>\beta</math></i>   | rs4821877  | T=0.3447                    |
|                                 | rs9622978  | T=0.2184                    |
| <i>PDGFR<math>\alpha</math></i> | rs6554162  | A=0.3398                    |
|                                 | rs1800812  | T=0.2670                    |
| <i>PDGF<math>\beta</math></i>   | rs2302273  | A=0.0971                    |

MAF, minor allele frequency; KDR, kinase insert domain receptor; NRP1, neuropilin-1; PDGF, platelet-derived growth factor; PDGFR, PDGF receptor; SNP, single nucleotide polymorphism.

Table SII. Primers of SNPs for PCR amplification.

| SNP          | Primers for PCR amplification (5'-3') | Product size, bp |
|--------------|---------------------------------------|------------------|
| rs7692791-F  | ATTCCCTTAAATTGTGTGTGTGTG              | 199              |
| rs7692791-R  | ACTTCAACTGGGAATACCCTTCTT              |                  |
| rs2305948-F  | AAGGCACAGAATAATTTCCAAGAC              | 197              |
| rs2305948-R  | CTTGTAACCGAGACCTAAAAACC               |                  |
| rs6838752-F  | GTGACCATACATCCCAATTTAACA              | 201              |
| rs6838752-R  | TCAGATGTTGGATTCTGGTTTAGA              |                  |
| rs2034965-F  | AAGCAGATCACCTCTCACTACCTC              | 202              |
| rs2034965-R  | TGCACTTGTCAAATAACACAGAGA              |                  |
| rs13109660-F | AAGTTTCCCTGGTTCAAGCTAATA              | 196              |
| rs13109660-R | CAGGTGCTATGCAAAGATTACTGT              |                  |
| rs1870377-F  | AATTTTATTTCCCTCCCTGGAAGTC             | 201              |
| rs1870377-R  | GTAGGCTGCGTTGGAAGTTATTT               |                  |
| rs1531290-F  | CAAGTATGAAGCAATGGCAATAAC              | 211              |
| rs1531290-R  | TAAATTTTGCCTTTCAACCCTTAC              |                  |
| rs2804495-F  | TCTGCTCCTCTGCAGAACTTAGTA              | 198              |
| rs2804495-R  | CATCCTGATTGTAAGAGTCAGTGG              |                  |
| rs2065364-F  | TCAGCACTGAGTTACCAATGAGAT              | 184              |
| rs2065364-R  | ACAGTCCAATCGATTCTTTGAAAT              |                  |
| rs9622978-F  | CCTTAATAGAGAAATCACCCCTCA              | 201              |
| rs9622978-R  | TTGTTAGGGACAGGACAATCTTTT              |                  |
| rs2070296-F  | AGGTTATTTCTTGGGGAAGTTGTT              | 200              |
| rs2070296-R  | CCAGGATAATCTCTGACATCTTTG              |                  |
| rs4821877-F  | TCTACGGTCTCCTTTAGGTCTCTG              | 201              |
| rs4821877-R  | GTAAAGAAGTAGGCGAGGTCACAC              |                  |
| rs6554162-F  | ATATTTGCCTTCAATGATTCCTG               | 218              |
| rs6554162-R  | GAGTCACAGAGAAGTACTCCAACG              |                  |
| rs1800812-F  | ATTCCAAGGAATTCGTAGGGTTC               | 206              |
| rs1800812-R  | CTTGAAGTCACTTATCTGGTCGTG              |                  |
| rs2302273-F  | CAGAGTGGGTAACAGCTGAGTAGA              | 266              |
| rs2302273-R  | AGATCAACAAGGAGGAGGAGAGAG              |                  |

F, forward; R, reverse; PCR, polymerase chain reaction; SNP, single nucleotide polymorphism.

Table III. Genotype and proportion of selected SNPs.

| Gene                            | SNP                    | Genotype  | n (%)     |
|---------------------------------|------------------------|-----------|-----------|
| <i>KDR</i>                      | rs7692791              | TT        | 38 (46.9) |
|                                 |                        | CT        | 34 (42.0) |
|                                 |                        | CC        | 9 (11.1)  |
|                                 | rs2305948              | CC        | 63 (77.8) |
|                                 |                        | CT        | 17 (21.0) |
|                                 |                        | TT        | 1 (1.2)   |
|                                 | rs6838752              | CC        | 10 (12.3) |
|                                 |                        | CT        | 40 (49.4) |
|                                 |                        | TT        | 27 (33.3) |
|                                 | rs2034965              | GG        | 54 (66.7) |
|                                 |                        | GA        | 22 (27.2) |
|                                 |                        | AA        | 5 (6.2)   |
|                                 | rs13109660             | GG        | 37 (45.7) |
|                                 |                        | GA        | 36 (44.4) |
|                                 |                        | AA        | 8 (9.9)   |
|                                 | rs1870377              | AA        | 28 (34.6) |
|                                 |                        | AT        | 42 (51.9) |
|                                 |                        | TT        | 11 (13.6) |
| rs1531290                       | AA                     | 36 (44.4) |           |
|                                 | GA                     | 38 (46.9) |           |
|                                 | GG                     | 3 (3.7)   |           |
| <i>NRP1</i>                     | rs2070296 <sup>a</sup> | GG        | 11 (13.9) |
|                                 |                        | GA        | 47 (59.5) |
|                                 |                        | AA        | 21 (26.6) |
|                                 | rs2804495              | TT        | 24 (29.6) |
|                                 |                        | GT        | 39 (48.1) |
|                                 |                        | GG        | 18 (22.2) |
|                                 | rs2065364              | GG        | 34 (42.0) |
|                                 |                        | GA        | 40 (49.4) |
|                                 |                        | AA        | 7 (8.6)   |
| <i>PDGF<math>\beta</math></i>   | rs4821877              | CC        | 41 (50.6) |
|                                 |                        | CT        | 33 (40.7) |
|                                 |                        | TT        | 7 (8.6)   |
| <i>PDGFR<math>\alpha</math></i> | rs6554162              | AA        | 8 (9.9)   |
|                                 |                        | GA        | 36 (44.4) |
|                                 |                        | GG        | 37 (45.7) |

<sup>a</sup>Genotypes of 2 patients were lost for this SNP. KDR, kinase insert domain receptor; NRP1, neuropilin-1; PDGF, platelet-derived growth factor; PDGFR, PDGF receptor; SNP, single nucleotide polymorphism.
